# Supplementary material
Source: publisher site journal article supplement (https://www.dovepress.com/article/470994)
Supplement: Supplementary file 1 [file get_supplementary_file.php]

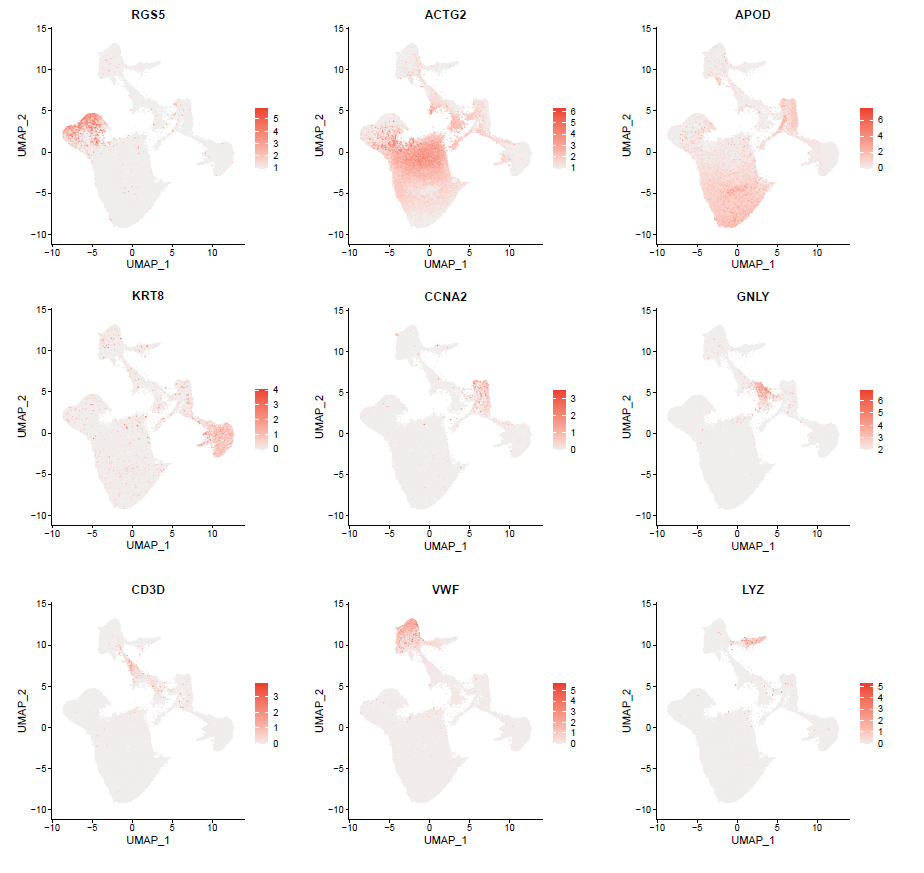


**Figure S1. UMAP plot, color-coded for relative expression (lowest expression to highest expression, white to red) of marker genes.**


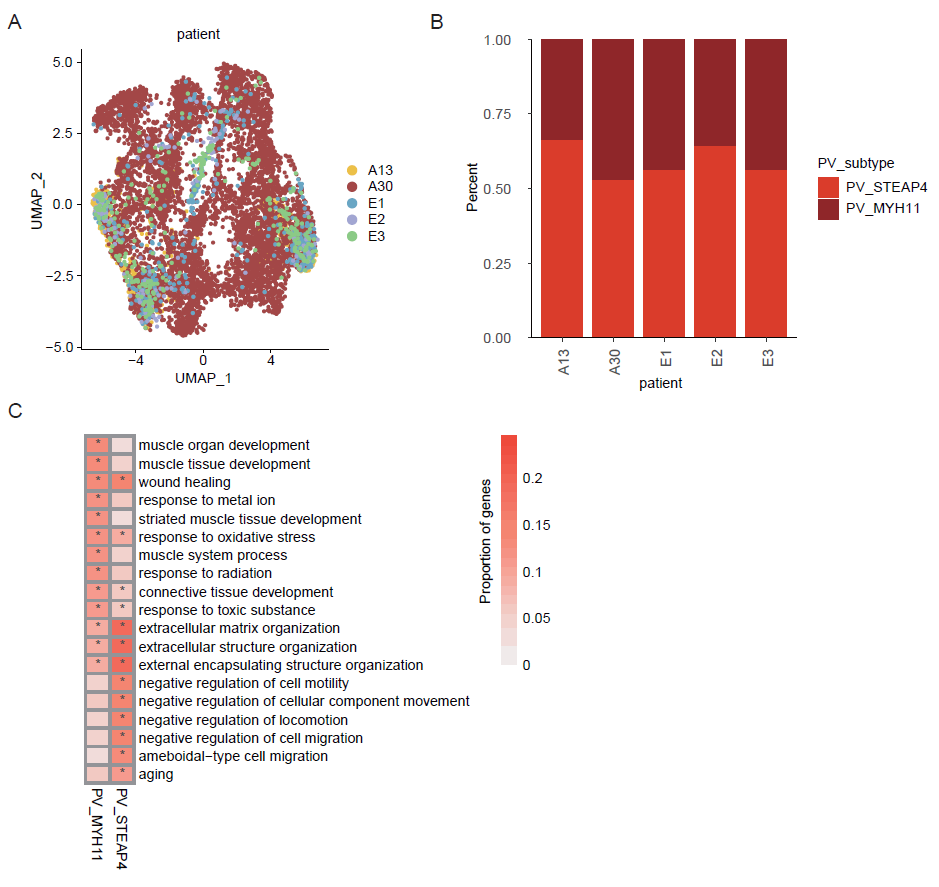


**Figure S2. PV cell clusters in human endometrium. A,** UMAP plot of PV cells color-coded according to patients. **B,** The cell fractions of different PV cell types originating from different patients. C, Heat map showing the proportion of genes annotated in each function. *p<0.05.


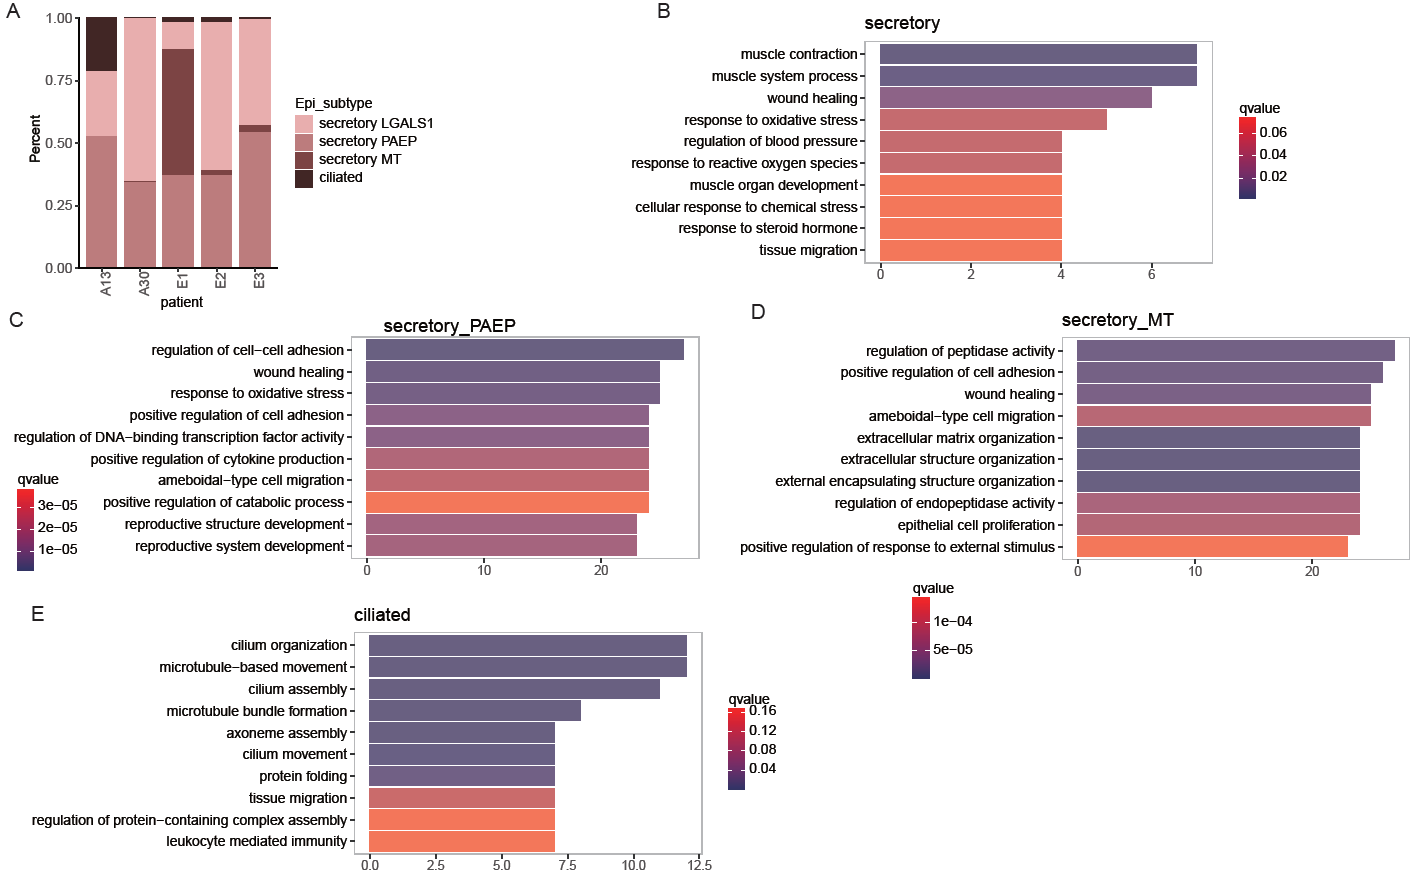


**Figure S3. Epithelial cell clusters in human endometrium. A,** The cell fractions of different epithelial cell types originating from different patients. B-E, Bar plots showing the enriched functions of genes highly expressed in different epithelial cell clusters.


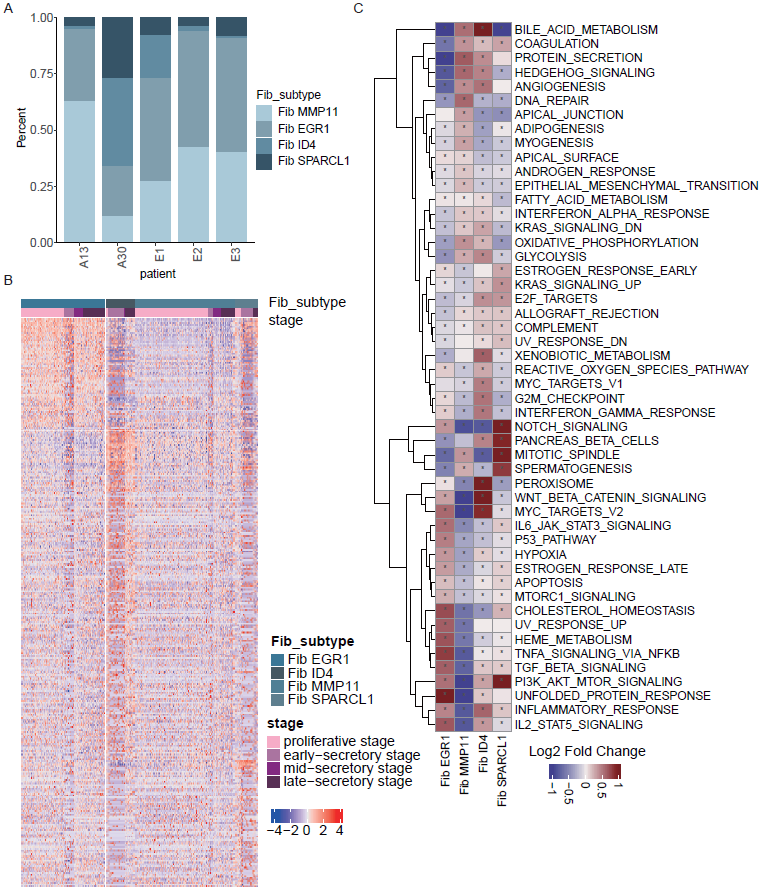


**Figure S4. Fibroblast cell clusters in human endometrium. A,** The cell fractions of different fibroblast cell types originating from different patients. **B,** Heat map showing the expression levels of genes highly expressed in corresponding fibroblast subtypes. C, Heat map showing the differences of pathway activities among fibroblast subtypes.


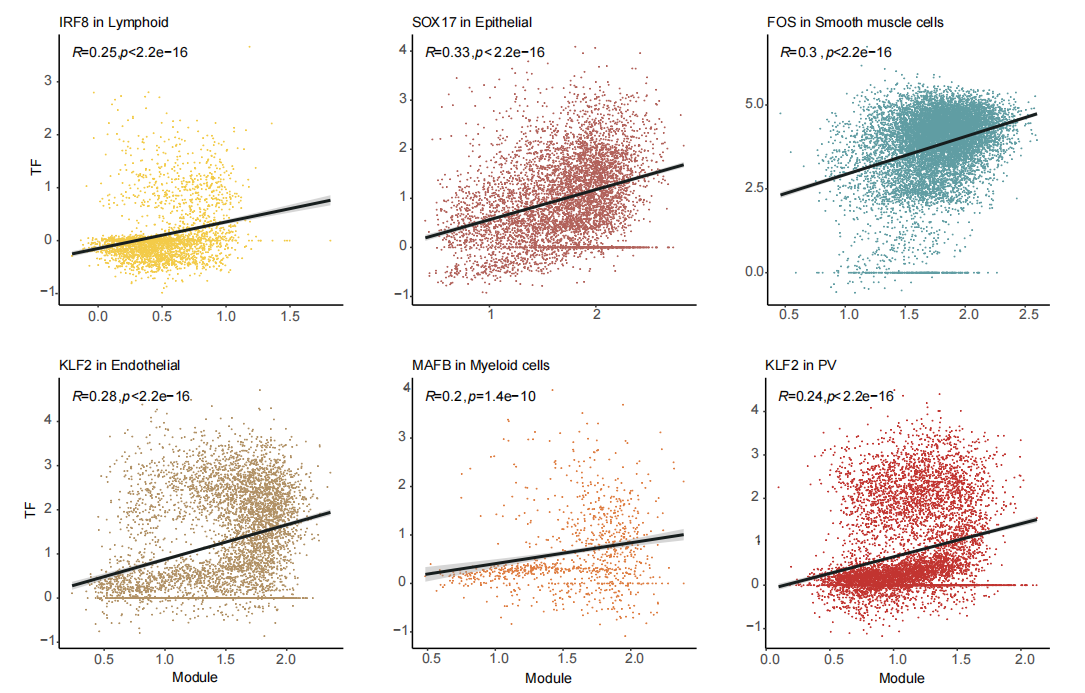


**Figure S5. Scatter plots showing the correlations between the expressions of TFs and the activities of modules.**


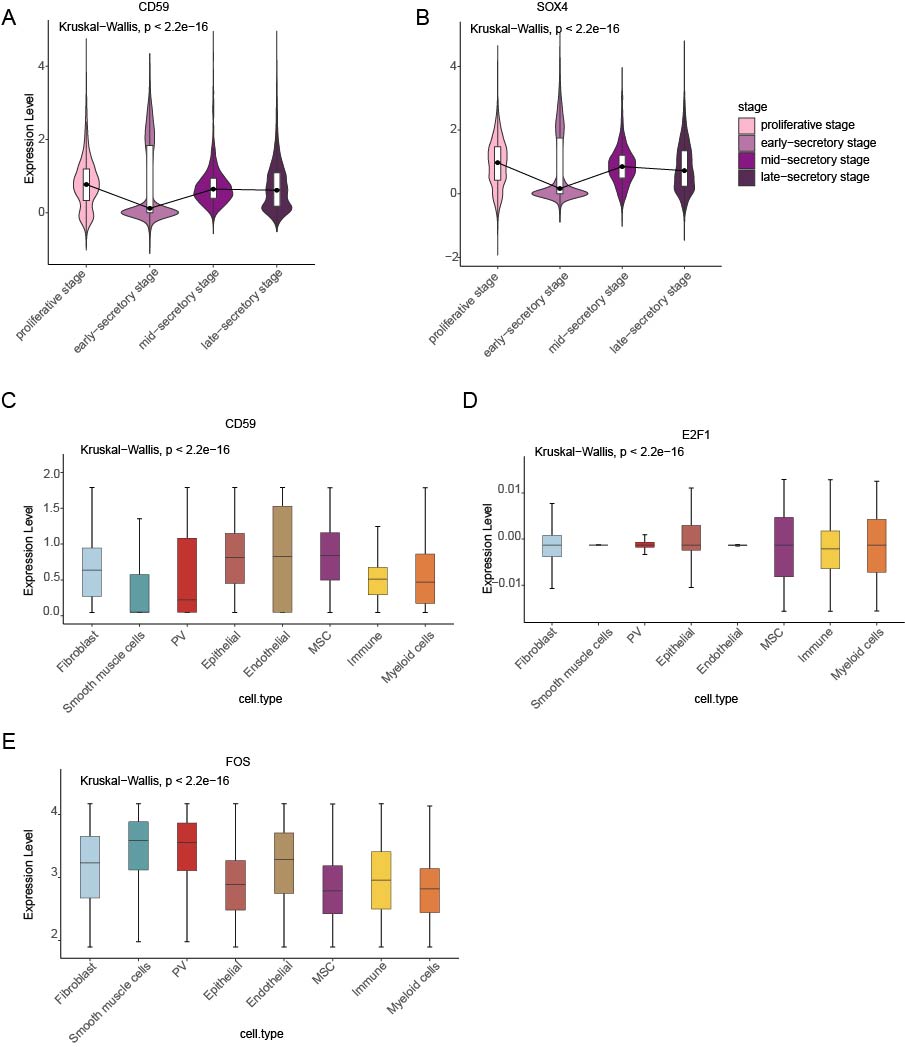


**Figure S6. Expression of marker genes across cell types.**


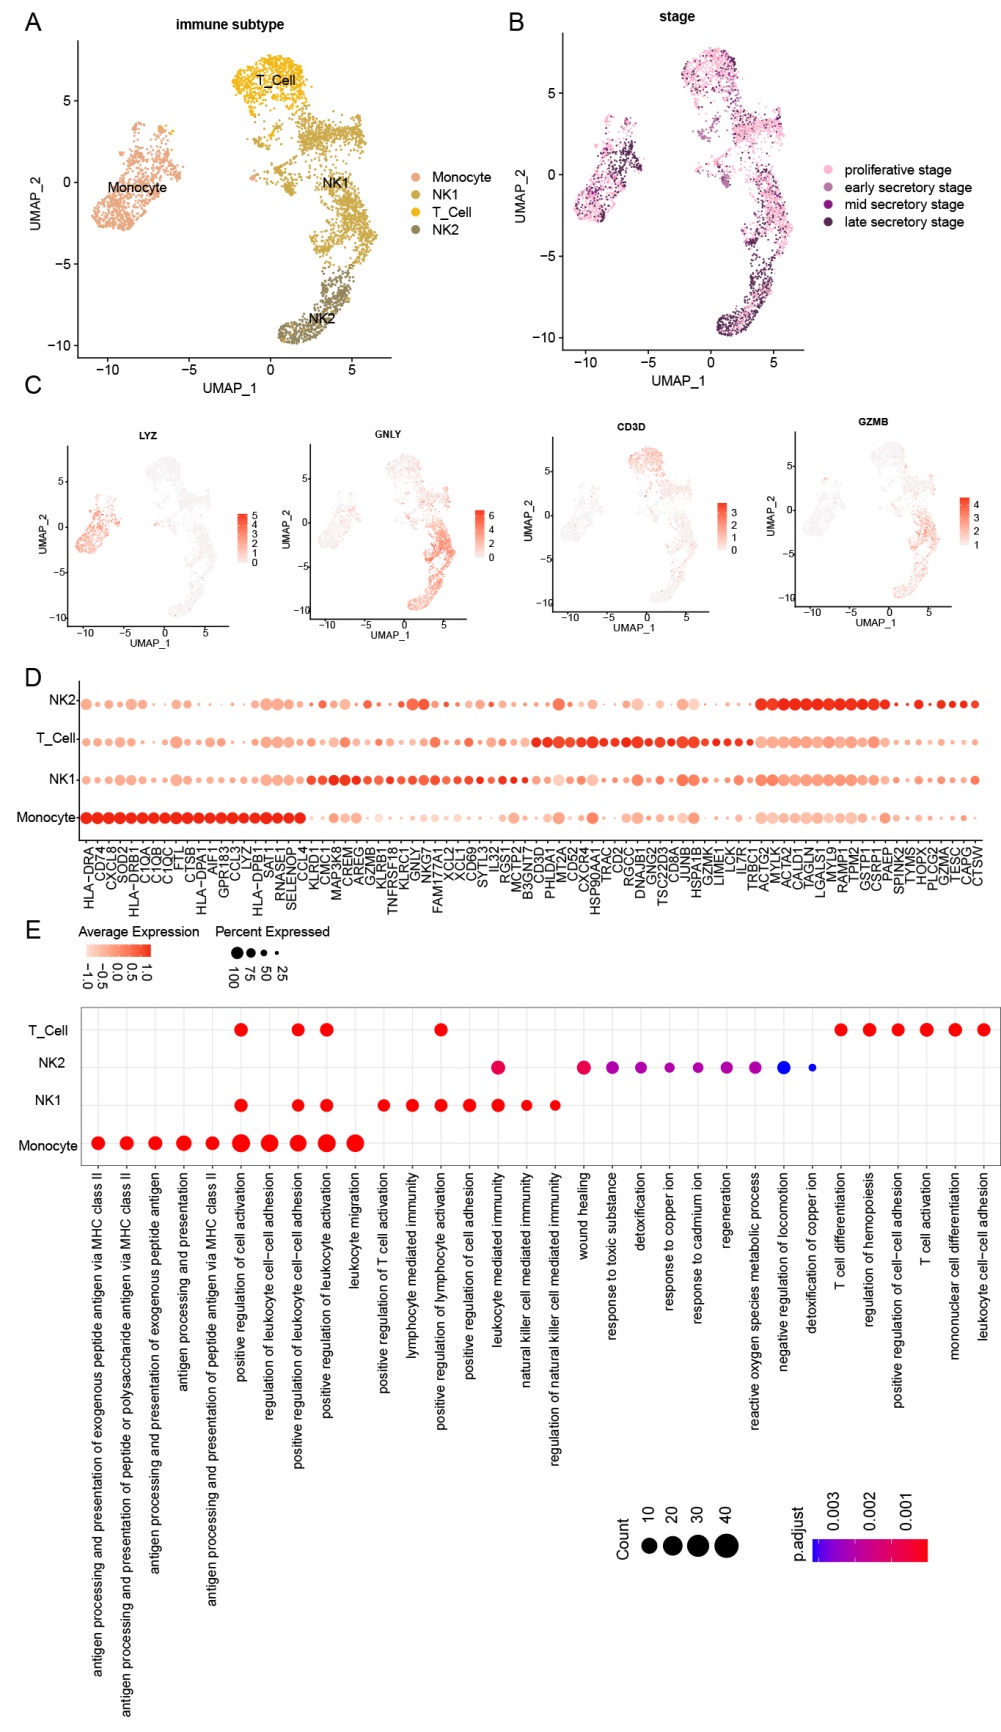


**Figure S7. Immune cell clusters in human endometrium. A,** UMAP plot of immune cells color-coded according to cell types. **B,** UMAP plot of immune cells color-coded according to different phases. **C,** UMAP plots showing the expression of marker genes. **D,** Dot plots showing the expression levels of genes highly expressed in corresponding immune subtypes. **E,** Dot plots showing the enrichments of pathways among immune subtypes.


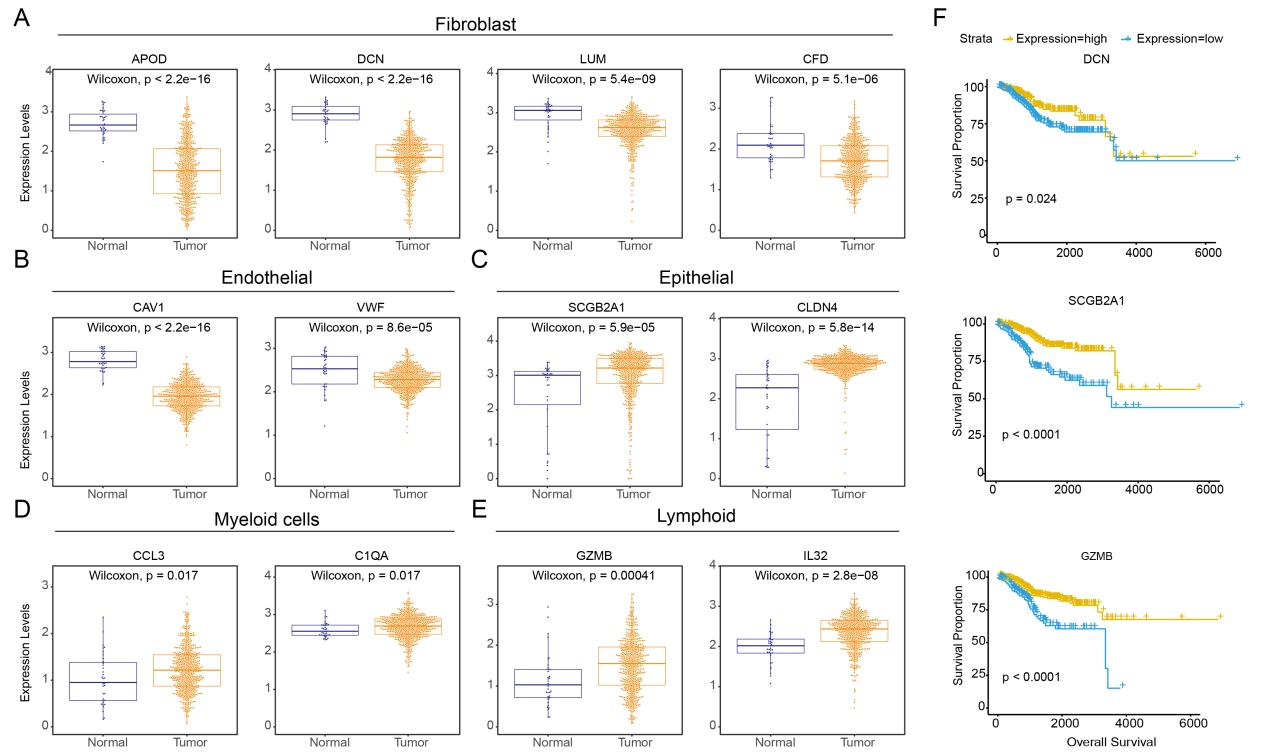


**Figure S8. The expressions and clinical relevance of genes highly expressed in cell types.** A-E, Expression of genes in normal and cancer. F, The overall survival curves based on EC patients data, stratified by the expression patterns of genes.
